# Supplementary material for: Glycopyrrolate for Drooling in Children with Medical Complexity Under Three Years of Age
Source: Research Square preprint supplement (doi:10.21203/rs.3.rs-95070/v1), 2020-10-28
Supplement: Supplementary file 1 [file 668936a006589f60633ca8e9.docx]

|  |  |
| --- | --- |
| Patients 18 | |
| Age | |
| Median  Range  <12 months | 17.5 months |
| 2-36 months |
| 6 patients |
| Sex | |
| Male  Female | 10 |
| 8 |
| Weight | |
| Median  Range | 9.8 kg |
| 3.5-22 kg |
| Diagnosis | |
| CEREBRAL PALSY  Genetic/Malformative | 9 |
| 9 |
|  |
| COGNITIVE IMPAIRMENT | 100% |
| Speech Anomalies | 100% |
| Gastrostomy | |
| Yes  No | 16 |
| 2 |
| Tracheostomy | |
| Yes  No | 12 |
| 6 |
| Mechanical Ventilation | |
| Yes  No | 2 |
| 16 |

**S1 Fig. Patients Characteristics.**
